# Supplementary material
Source: Research Square preprint supplement (doi:10.21203/rs.3.rs-9605419/v1)
Supplement: Supplementary file 1 [file f41b64f296b4717b41811bbb.docx]

Appendix A.

*Content and Implementation Process of CRA-based Mathematics Program*

| **Week** | **Session** | **Activity Name** | **Mathematical Content** |
| --- | --- | --- | --- |
| Week 1 | 1st Session | Let's Match the License Plates | Number recognition, matching, classification |
|  | 2nd Session | Let's Group Different Patterns | Pattern recognition, sorting |
| Week 2 | 3rd Session | Dogs Are Comparing | Comparison (more/less), one-to-one correspondence |
|  | 4th Session | Birthday Party with Patterns | Pattern creation and extension |
| Week 3 | 5th Session | Let's Order the Amounts of Water in Jars | Measurement (volume), ordering by quantity |
|  | 6th Session | Let's Count the Stars Together | Counting, number sequence |
| Week 4 | 7th Session | Explorers on the Island Are Counting | Counting, grouping objects |
|  | 8th Session | Numbers Apartment | Number representation, numeral-object match |
| Week 5 | 9th Session | Mr. Titi Learns Addition and Subtraction | Basic addition and subtraction |
|  | 10th Session | We Are Adding with Dominoes | Addition using concrete materials (dominoes) |
| Week 6 | 11th Session | I Am Subtracting with Bowling Pins | Subtraction, object removal |
|  | 12th Session | Addition and Subtraction on the Bus | Simple operations in story context |
| Week 7 | 13th Session | How Far Are the Animals from Their Food? | Spatial relationships, measurement (length) |
|  | 14th Session | I Am Measuring the Length of the Bridge | Non-standard units of measurement, length |
| Week 8 | 15th Session | The Traveling Eagle’s Patterns | Repeating and growing patterns |
|  | 16th Session | Shape Carpet | 2D shapes, visual discrimination |
| Week 9 | 17th Session | Learning Shapes with Shape and Shukul | Properties of geometric shapes |
|  | 18th Session | Curious Rabbit Discovers Prisms | 3D shapes, solid figures |
| Week 10 | 19th Session | Shape Hat Festival | Identifying and naming 2D/3D shapes |
|  | 20th Session | Bear Family’s Pear Pieces | Part-whole relationships, visual estimation |
| Week 11 | 21st Session | Which Whole Could These Parts Belong To? | Fractions, part-whole concept |
|  | 22nd Session | Chick’s Fraction Diet Plan | Introduction to fractions |
| Week 12 | 23rd Session | Positions in Stories | Positional concepts (in, on, under, beside) |
|  | 24th Session | Finding Directions at the Market | Spatial orientation, directionality |

Appendix B.

*Information Sessions for the Experimental Group Teacher*

| **Session** | **Session Content** |
| --- | --- |
| 1st Session | The Importance of Mathematics in Preschool Education and Mathematical Approaches |
| 2nd Session | What is the Concrete–Representational (Pictorial)–Abstract Approach? |
| 3rd Session | Content and Features of the CRA Approach Mathematics Program |
| 4th Session | Attitudes, Observation, and Recording in the Implementation Process |
